# Supplementary material
Source: Springer Nature journal article supplement (https://www.springermedizin.de/resource/supplementary/12985_2010_951_MOESM6_ESM.pdf/9608810)

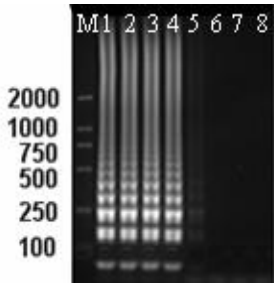

A

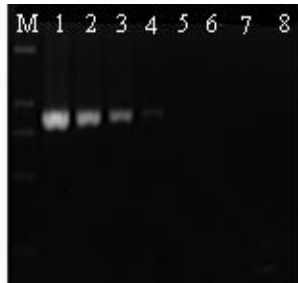

B

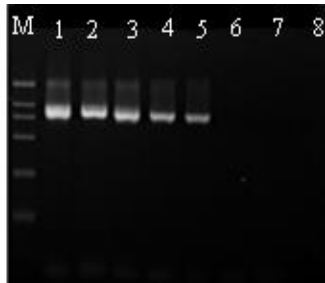

C

Supplement: MOESM6 [file 9608810]
